# Supplementary material
Source: PubMed Central journal article supplement (PMC545818)
Supplement: 7600531s1.pdf [file 7600531s1.pdf]

Supplementary Material

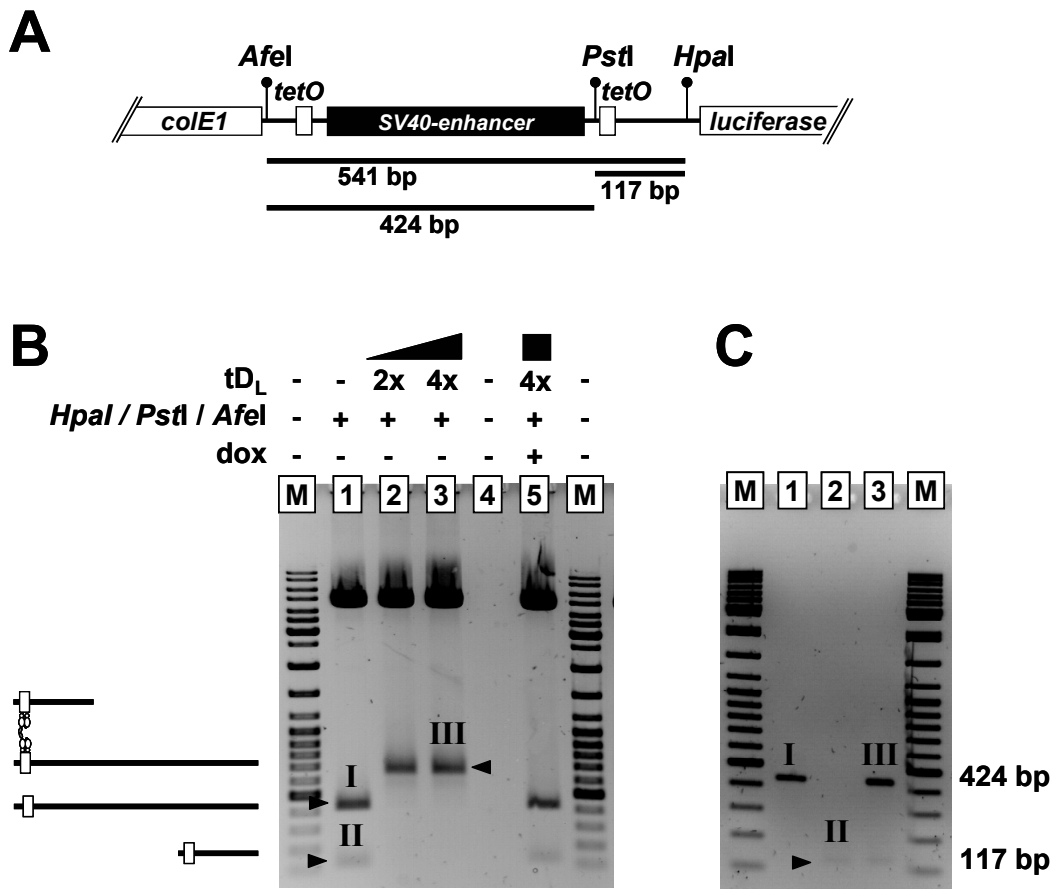

**Figure S1: tD<sub>G</sub> interacts with single *tet* operators on both sides of the SV40 enhancer *in vitro*.** (A) Partial restriction map of the pWHE228 plasmid. If tD<sub>L</sub> interacts with *tet* operators on both sides of the SV40 enhancer on supercoiled DNA, two DNA fragments (424 and 117 bp) generated after digestion with restriction enzymes *HpaI*, *AfeI* and *PstI* are expected to be bound to tD<sub>L</sub> and migrate as a single DNA-protein complex in a native gel. (B) Analysis of tD<sub>L</sub>-induced DNA-protein complex formation on supercoiled DNA: supercoiled pWHE228 was pre-incubated with or without tD<sub>L</sub>, then digested and analyzed in a native agarose gel. The expected products of digestion are shown on the left. Different bands in the gel are arbitrarily numbered. M, peqGOLD DNA ladder (peqlab, Germany). (C) Analysis of DNA composition of the tD<sub>L</sub> dependent DNA-protein complex. DNA was purified from different bands [I-III in (B)] and analyzed on a 2% agarose gel. M, peqGOLD DNA ladder (peqlab, Germany).
