# Supplementary material
Source: PubMed Central journal article supplement (PMC545818)
Supplement: 7600531s2.pdf [file 7600531s2.pdf]

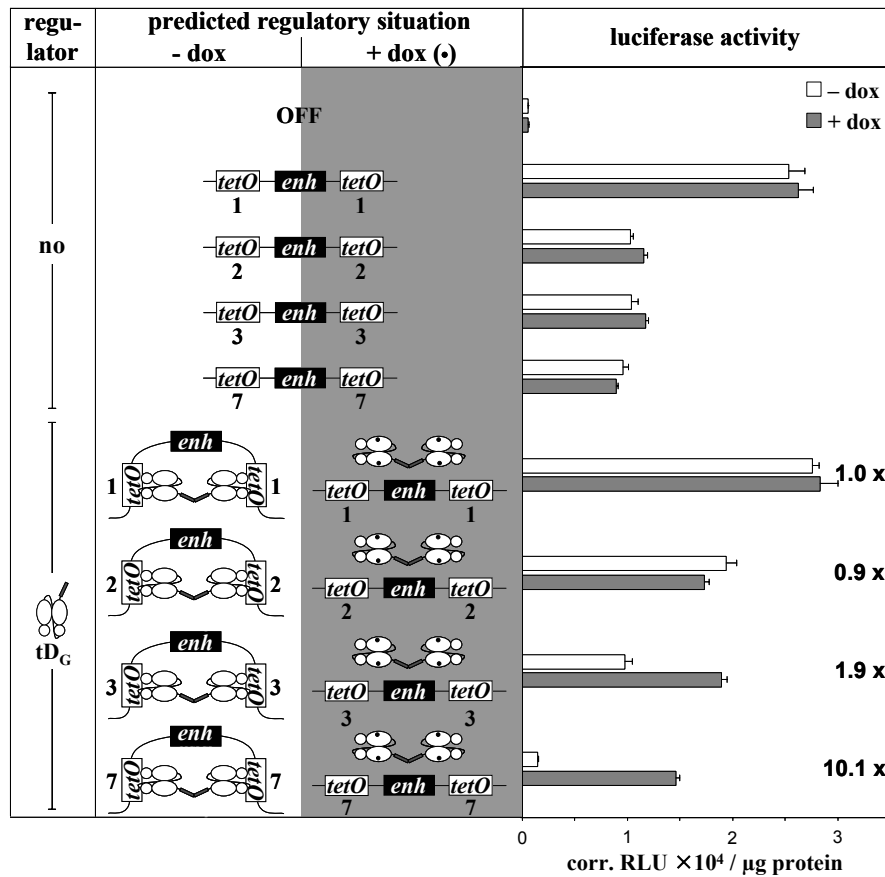

**Figure S2: Multiple *tet* operators are necessary to completely regulate the enhancer by the homodimerization system.** HeLa cells were co-transfected transiently with 100 ng each of the reporter plasmids pWHE228, pWHE229, pWHE230, and pWHE206 encoding an SV40-enhancer flanked with one, two, three, and seven *tet* operators, respectively and a luciferase gene under the control of an SV40-promoter, and 100 ng regulator plasmid carrying either no transregulator or tD<sub>G</sub> as indicated in column one. To determine unenhanced basal activity, 100 ng pGL3-Promoter (OFF), lacking the SV40-enhancer and *tet* operators, was transfected. Cells were cultured in the absence (white bars) or presence (grey bars) of 5 μg/ml dox. The corresponding predicted regulatory situations are shown in column two. Luciferase activity was determined from cell extracts 24 h after induction. Values represent the means of triplicate samples with standard deviations given in corrected relative ray light units (corr. RLU) per μg of total cell protein.
